# Supplementary material for: A chemical chaperone improves muscle function in mice with a RyR1 mutation
Source: PubMed Central journal article supplement (PMC5376670; doi:10.1038/ncomms14659), 2017-03-24
Supplement: ncomms14659-s1.pdf [file ncomms14659-s1.pdf]

## Supplementary Materials

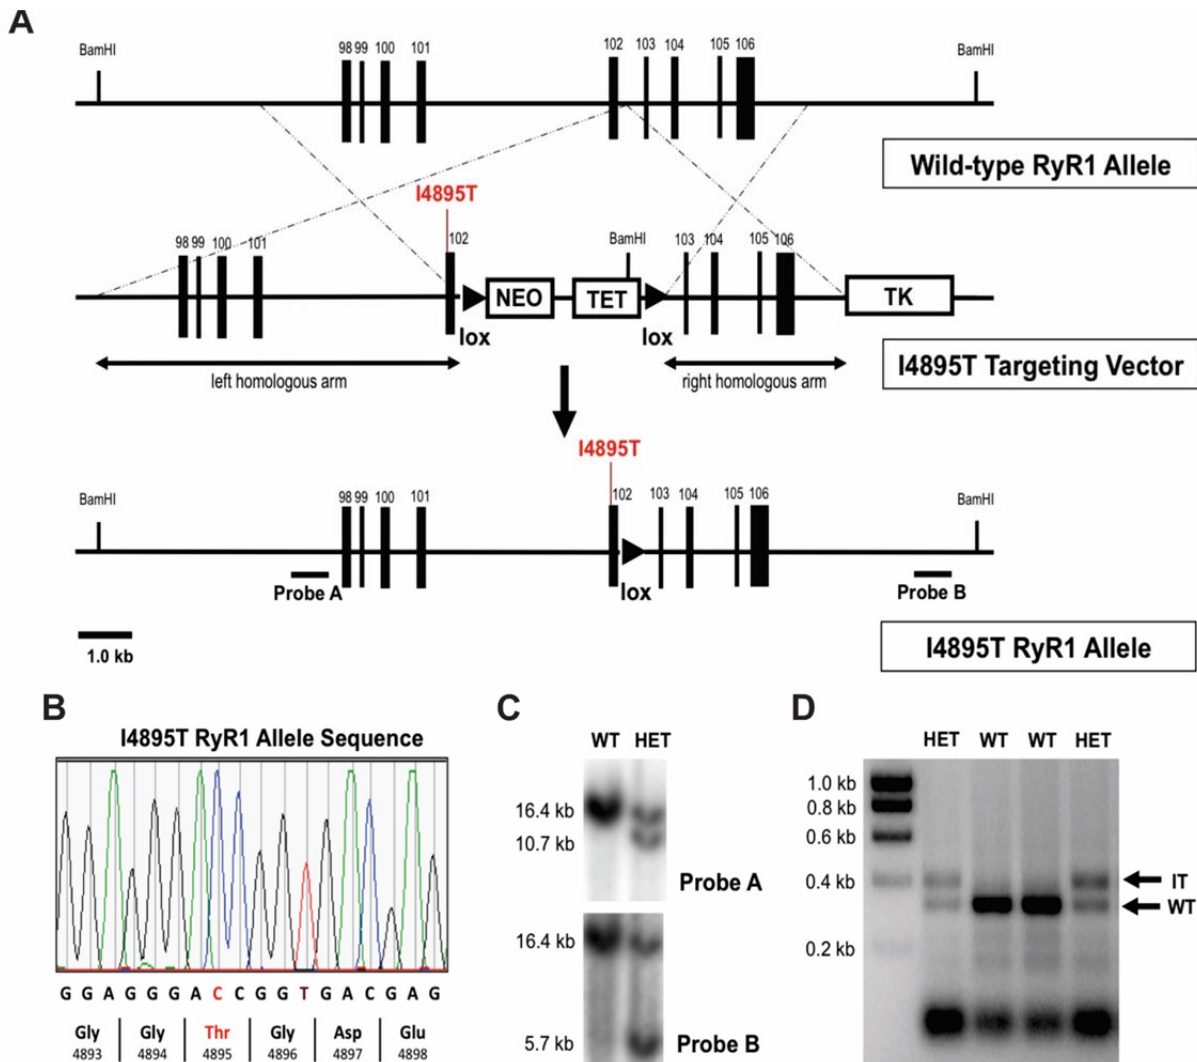

**Supplementary Fig. 1. Creation of I4895T mice.** **A.** Generation and verification of RyR1 I4895T mice. Targeted I4895T knockin allele after removing NEO-TET cassette is shown on the bottom of A. **B.** Sequencing of I4895T targeting construct. **C.** Genotyping of I4895T by Southern blot. **D.** Genotype differentiation of I4895T and WT by PCR.

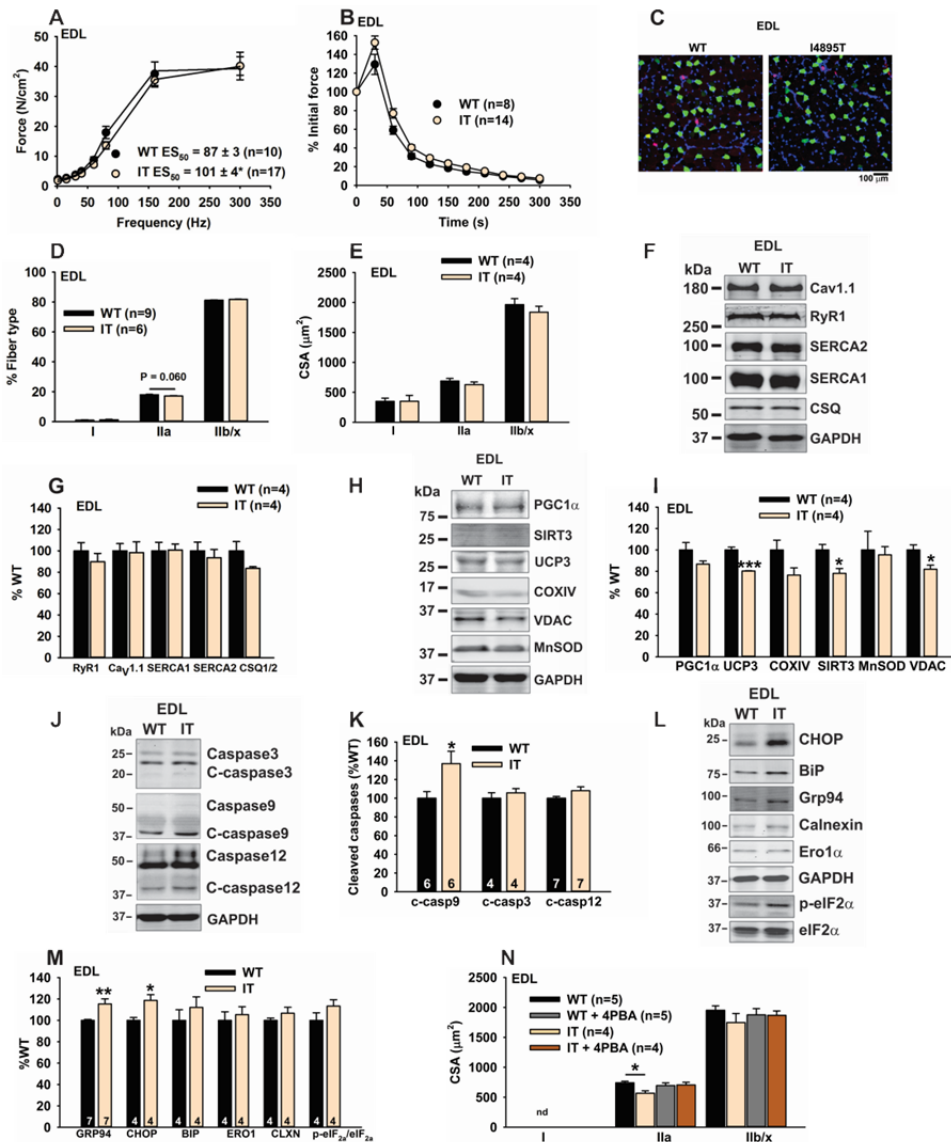

**Supplementary Fig. 2. Effect of the IT mutation on the EDL muscle.** **A.** Force frequency curve. **B.** Fatigue curve. **C.** Representative fiber type immunofluorescence images of 8-week-old IT and WT mice. **D.** Analysis of fiber types. **E.** Analysis of CSA. **F.** Representative western blot images for Cav1.1, RyR1, SERCA1/2, CSQ, and GAPDH in EDL of IT and WT littermates. **G.** Analysis of calcium handling proteins (depicted as %WT) in EDL. **H.** Representative western blot images of mitochondrial proteins, Sirt3, UCP3, COXIV, VDAC and MnSOD in EDL of IT and WT littermates. PGC1 $\alpha$  and GAPDH are used as a master regulator for the mitochondrial biosynthesis and as a normalizing protein, respectively. **I.** Analysis of intensity of bands in panel H. **J.** Representative western blots of cleaved caspases in the EDL of IT and WT mice. **K.** Analysis of cleaved caspases in the EDL. **L.** Representative western blot of proteins involved in ER stress in EDL of IT and WT littermates. **M.** Analysis of ER stress markers in EDL. **N.** Analysis of CSA of the EDL fibers from 29-week-old mice WT and IT mice treated with or without chronic 4PBA (up to 4 weeks). nd, not detected. Data are shown as mean  $\pm$  SEM. \* $P$ <0.05, \*\* $P$ <0.01, \*\*\* $P$ <0.001.

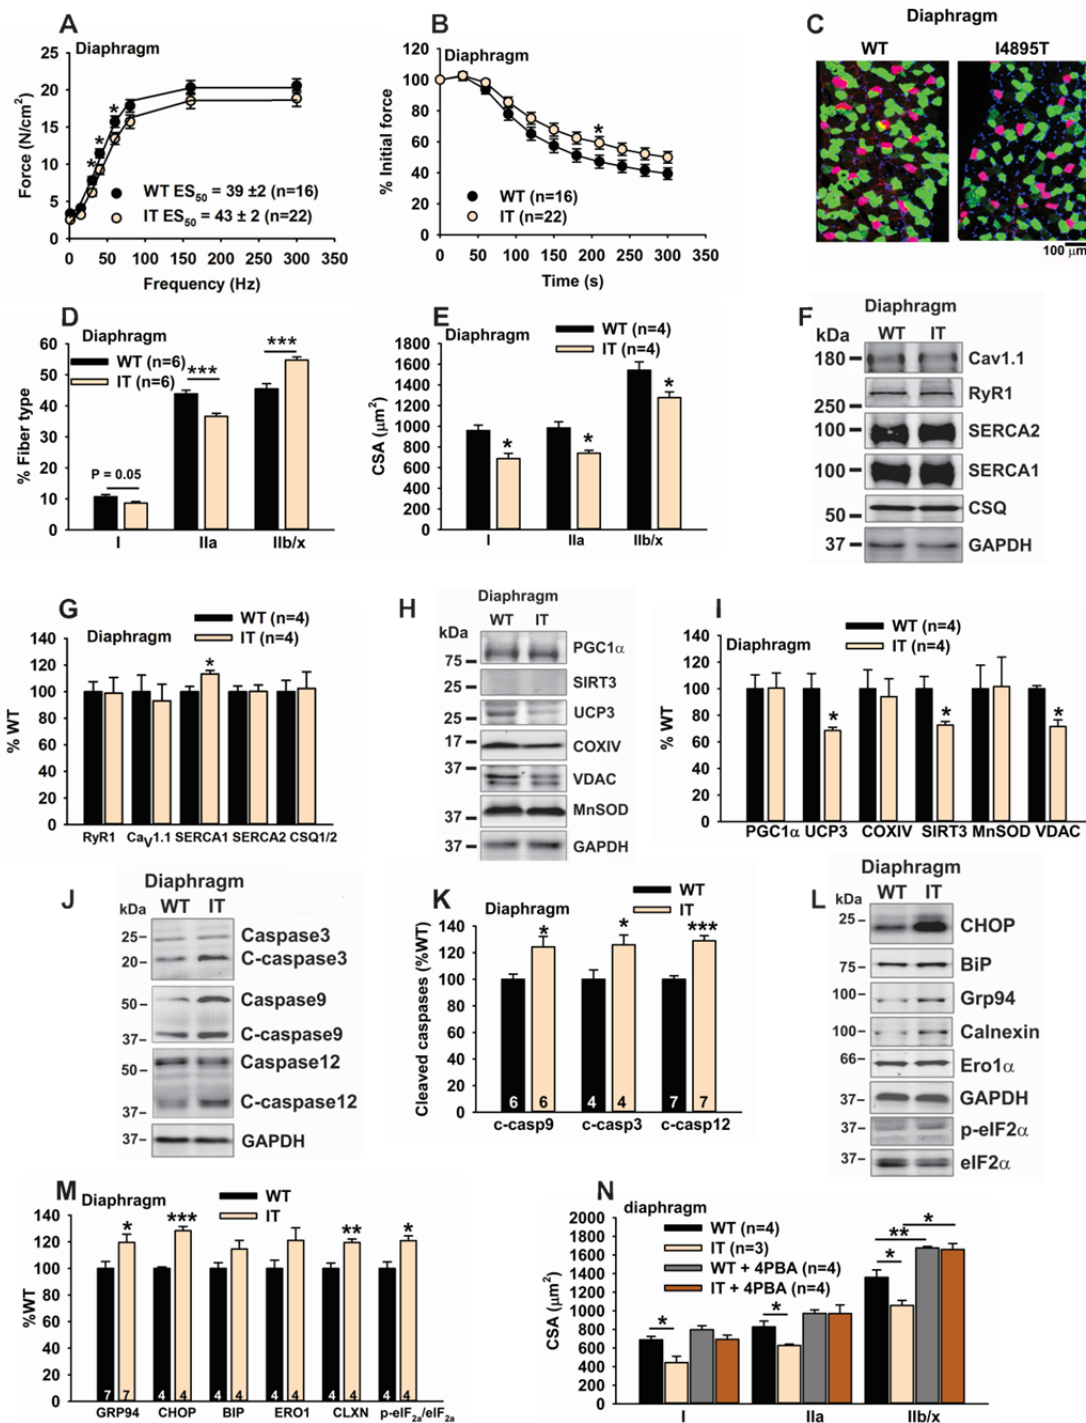

**Supplementary Fig. 3 Effects of the IT mutation in the diaphragm.** **A.** Force frequency curve of diaphragm. **B.** Fatigue curve of diaphragm. **C.** Representative fiber type immunofluorescence images of 8-week-old IT and WT mice. **D.** Analysis of fiber types. **E.** Analysis of CSA. **F.** Representative western blot images for Cav1.1, RyR1, SERCA1/2, CSQ, and GAPDH in EDL of IT and WT littermates. **G.** Analysis of calcium handling proteins (depicted as %WT) in EDL. **H.** Representative western blot images of mitochondrial proteins, Sirt3, UCP3, COXIV, VDAC and MnSOD in diaphragm of IT and WT littermates. PGC1α and GAPDH are used as a master regulator for the mitochondrial biosynthesis and as a normalizing protein, respectively. **I.** Analysis of intensity of bands in panel H. **J.** Representative western blots of cleaved caspases in the diaphragm of IT and WT mice. **K.** Analysis of cleaved caspases in the diaphragm. **L.** Representative western blot of proteins involved in ER stress in the diaphragm of IT and WT littermates. **M.** Analysis of ER stress markers in the diaphragm. **N.** Analysis of CSA of the diaphragm fibers from 29-week-old mice WT and IT mice treated with or without chronic 4PBA (up to 4 weeks). Data are shown as mean ± SEM. \**P*<0.05, \*\**P*<0.01, \*\*\**P*<0.001.

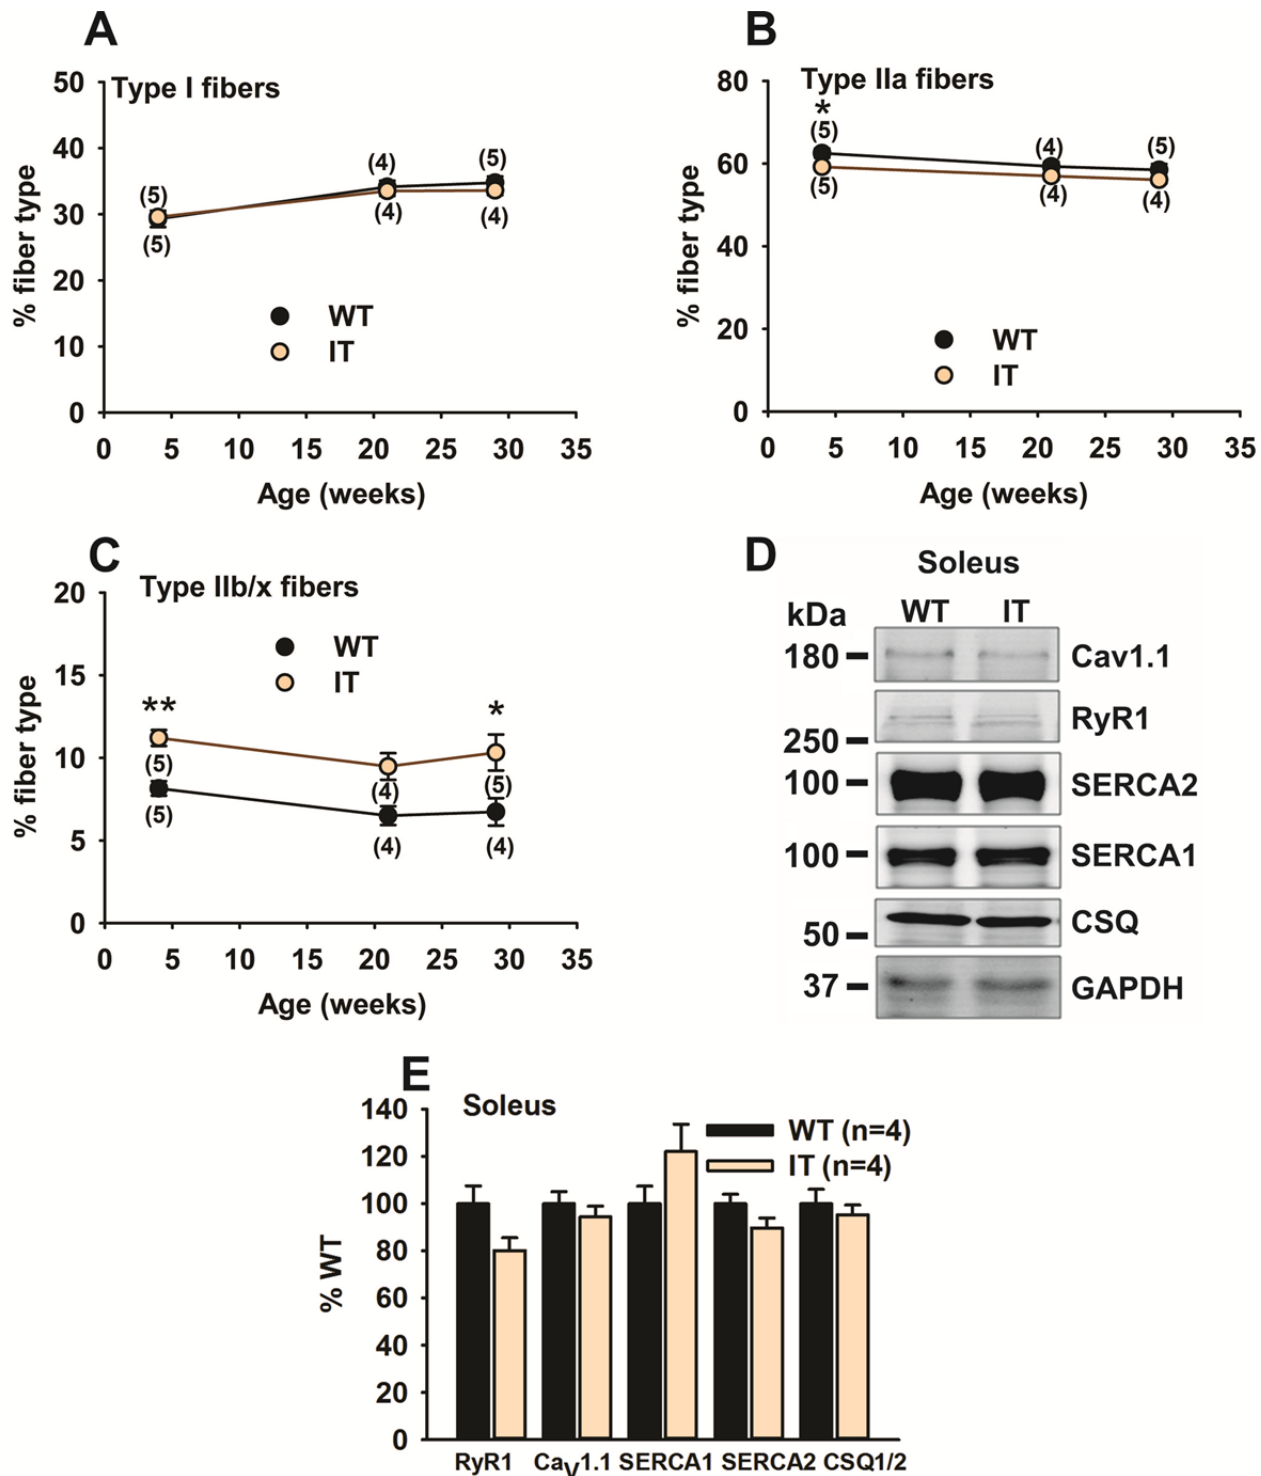

**Supplementary Fig. 4. Effects of the IT mutation in the soleus.** A-C Analysis of % type I (A), type IIa (B) and type IIb/x fibers (C) in the soleus of IT and WT littermate mice at 3 different age groups. Number in bracket means mouse numbers for the experiments. **D.** Representative western blot images for Cav1.1, RyR1, SERCA1/2, CSQ, and GAPDH in the soleus of IT and WT littermates. **E.** Analysis of calcium handling proteins (depicted as %WT) in the soleus. Data are shown as mean  $\pm$  SEM. \* $P < 0.05$ , \*\* $P < 0.01$ .

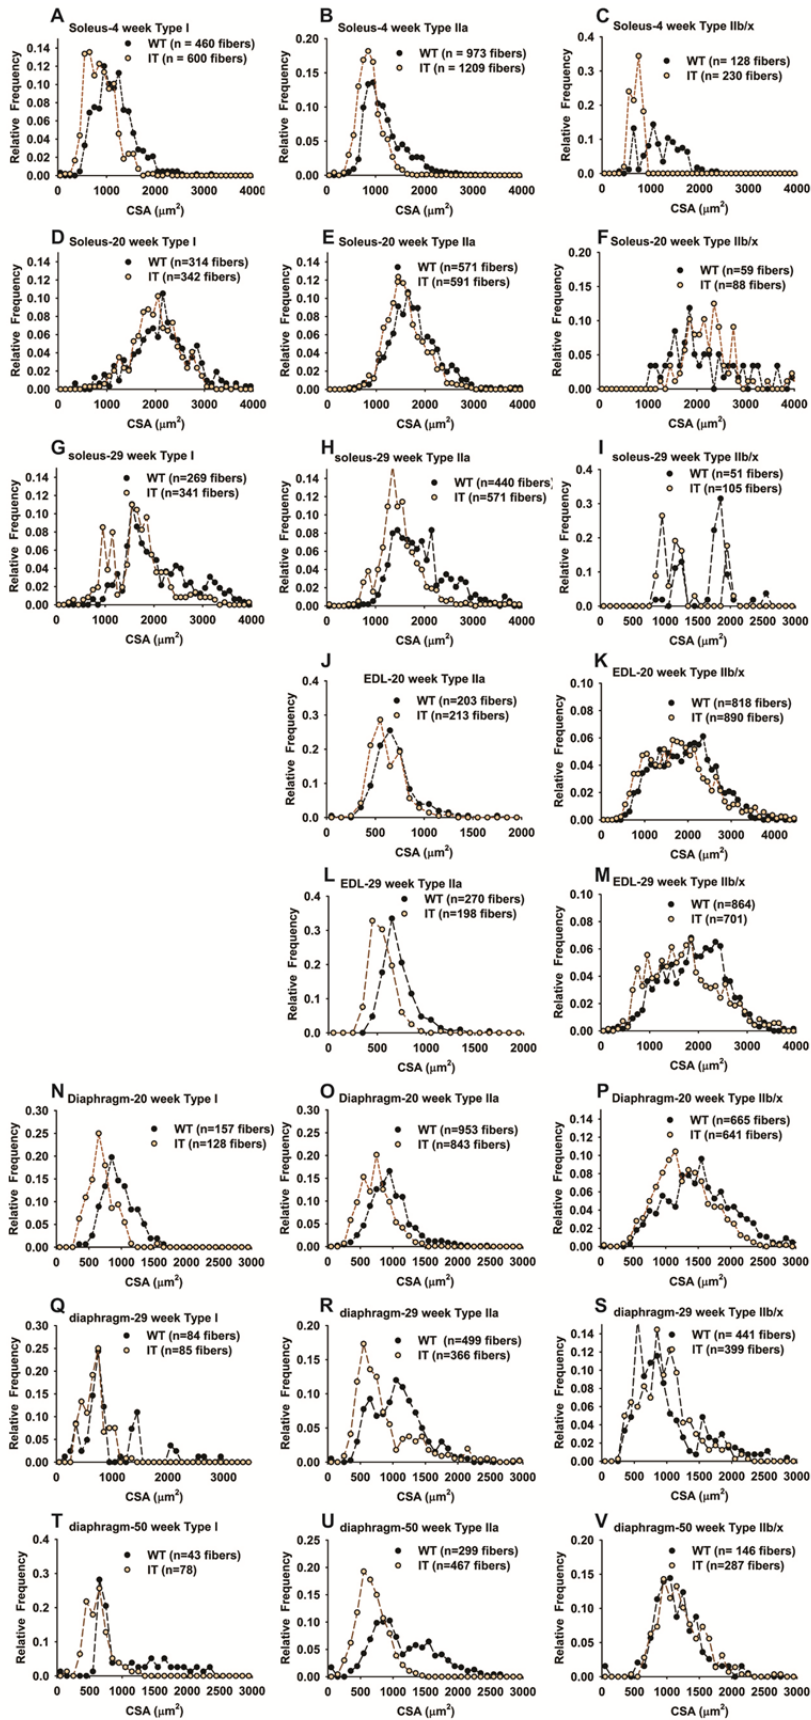

**Supplementary Fig. 5. Fiber CSA Frequency Distributions.** The analysis of cross-sectional area distributions in soleus (A-I), EDL (J-M) and diaphragm (N-V) from IT and WT littermate mice following developmental stages, 4 weeks (A-C), 20 weeks (D-F, J,K and N-P), 29 weeks (G-I, L,M and Q-S) and 50 weeks (T-V).

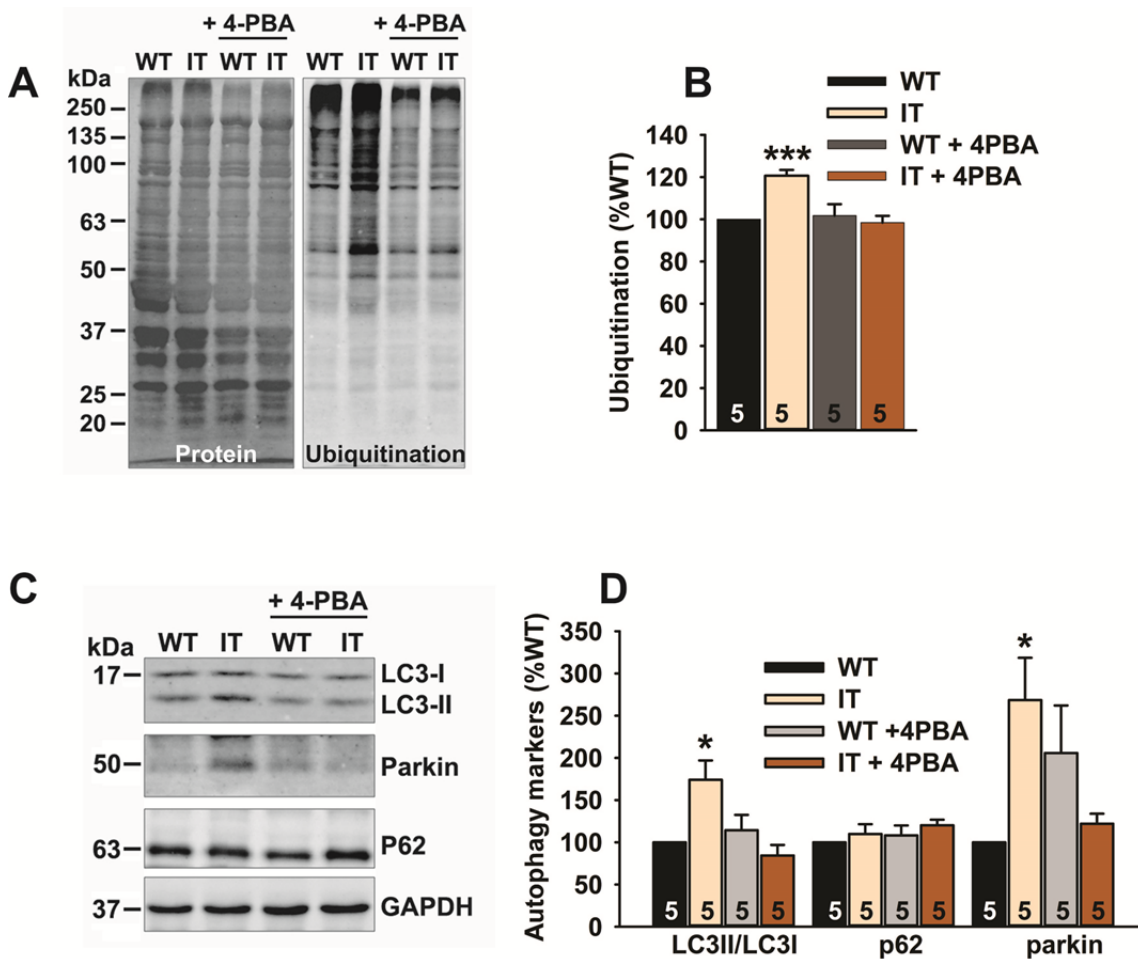

**Supplementary Fig. 6. Effect of 4-PBA treatment on markers of protein degradation and autophagy. A.** Representative western blot for ubiquitination of proteins in soleus muscle from IT and WT littermates without or with 4PBA for 2 weeks. **B.** Analysis of ubiquitination in panel A. **C.** Representative western blot for autophagy markers, LC3-I and -II, parkin, and p62 in lysates of soleus muscle from IT and WT littermates without or with 2 weeks 4PBA treatment. **D.** Analysis of autophagic markers shown in C. Data are represented as mean  $\pm$  SEM. \* $p < 0.05$ , \*\*\* $p < 0.001$ .

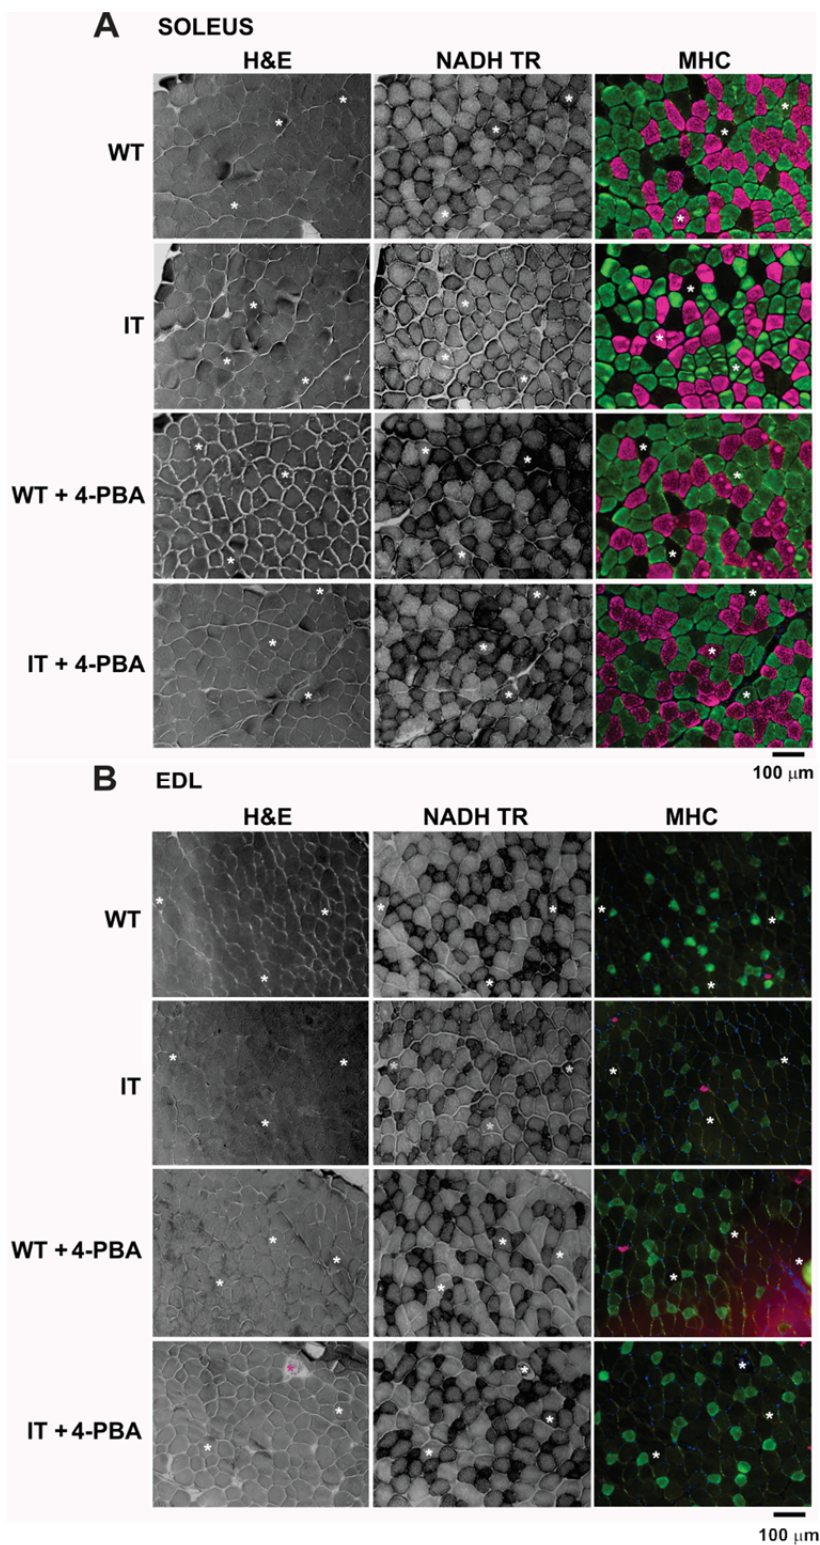

**Supplementary Fig. 7.** Muscle fiber staining with H&E, NADH-TZ (NADH tetrazolium for mitochondrial staining) and MHC in the soleus (A) and EDL (B) muscles of IT and WT littermates without or with chronic 4-PBA treatment (up to 3 weeks). Asterisks indicate the same fiber in each row. Bar is 100  $\mu$ m.

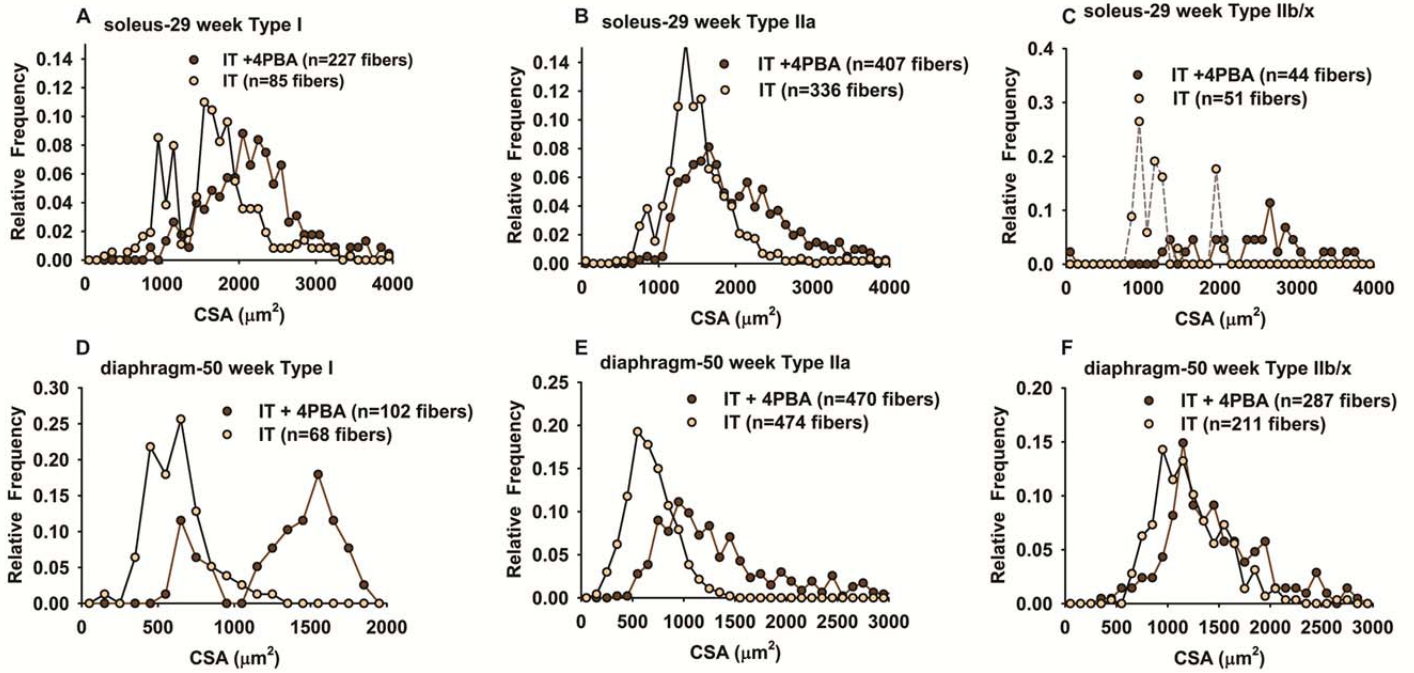

**Supplementary Fig. 8. Effect of 4PBA on fiber CSA distributions. A-C.** Analysis of fiber CSA distributions in the soleus of 29-week-old IT without or with chronic 4PBA treatment (up to 3 weeks). **D-F.** Analysis of fiber CSA distributions in the diaphragm of 50-week-old IT without or with chronic 4PBA treatment (up to 6 weeks). Analyzed fibers were from 3 to 4 different mice.



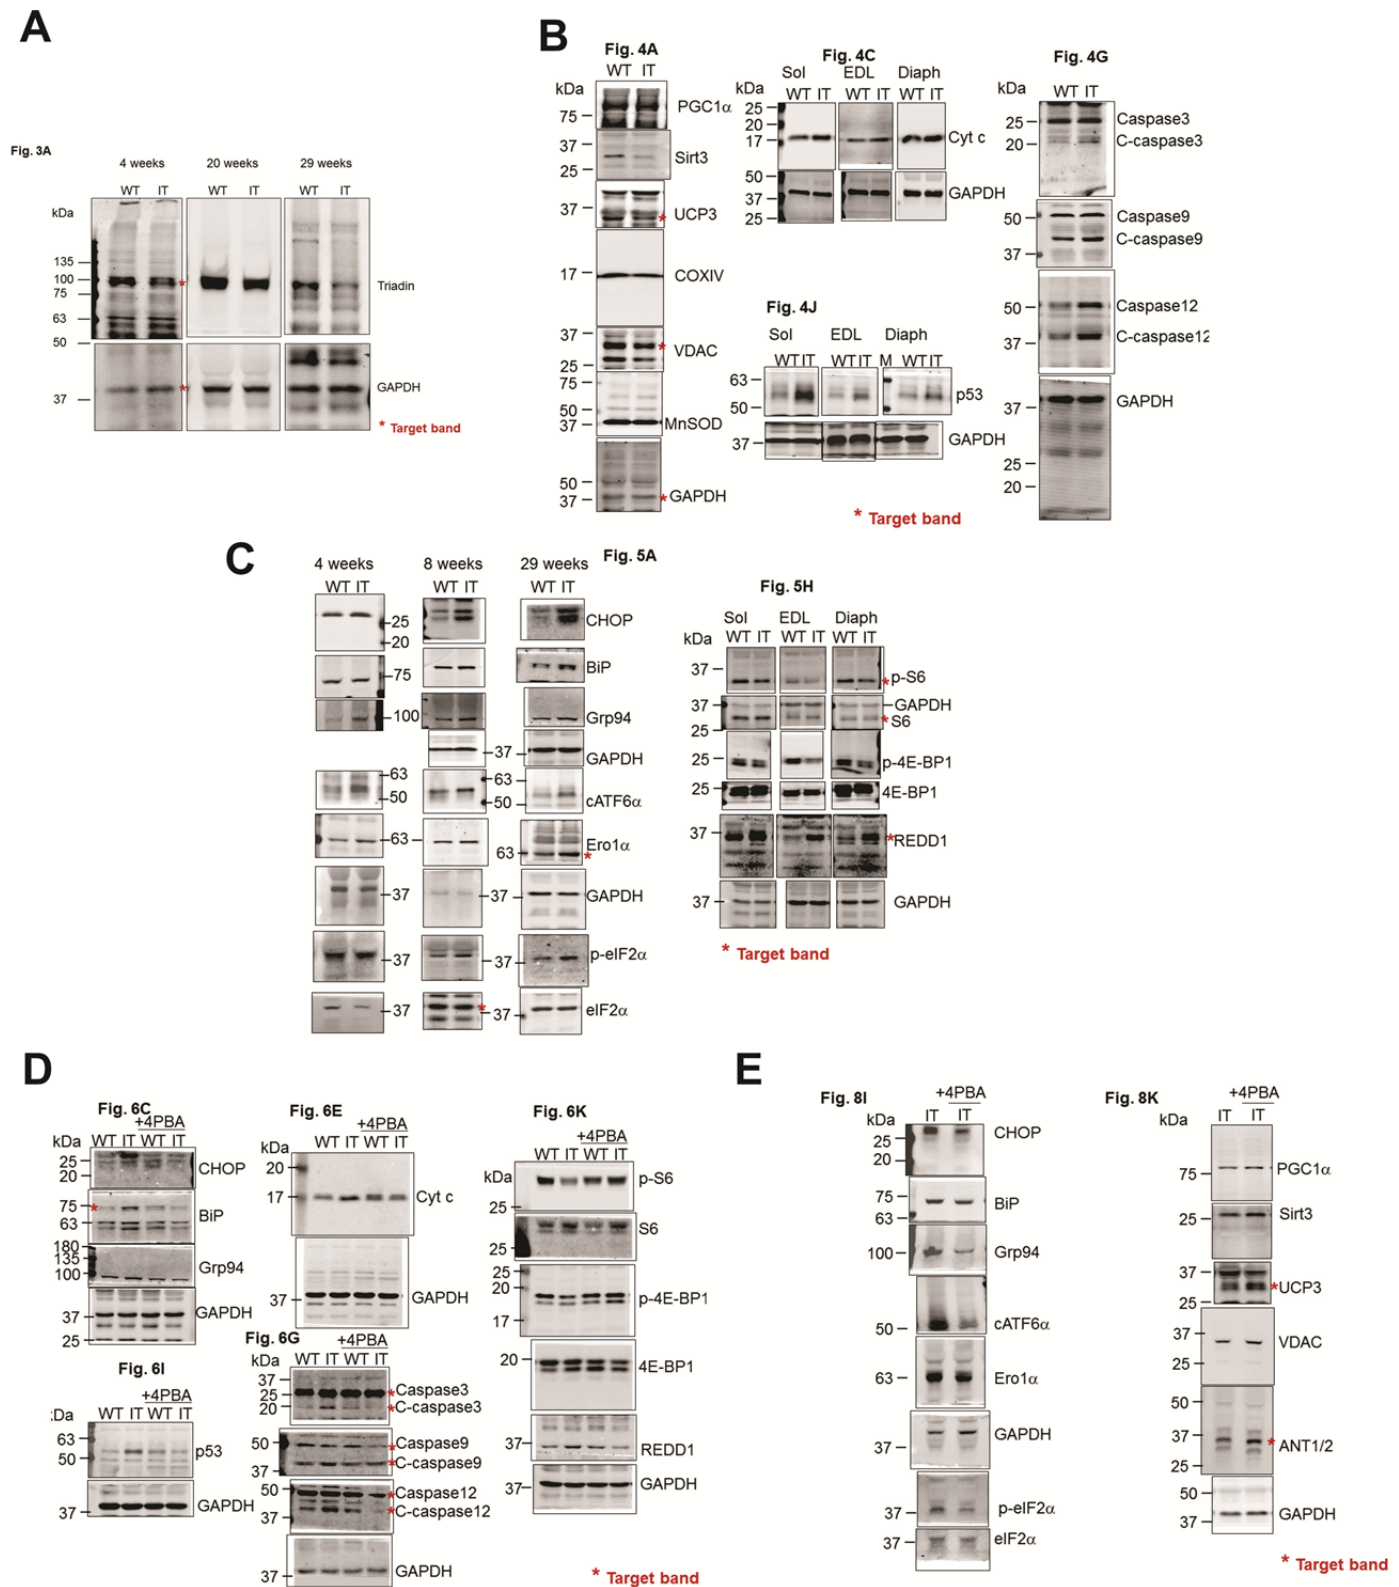

**Supplementary Fig. 9 Uncropped western blots in the main figures.** Blots after transferring of proteins were cut along molecular weight markers to obtain multiple blots. **A.** Uncropped images for **Fig. 3A.** Representative western blots of triadin levels in soleus muscle from WT and IT mice at different ages. **B.** Uncropped images for **Fig. 4.** **4A.** Western blots for mitochondrial proteins in homogenates of soleus muscles from WT and IT mice. **4C.** Western blots of cytosolic cytochrome c in soleus from WT and IT. **4G.** western blots for caspases. **4J.** Western blot for p53 in muscles of IT and WT. **C.** Uncropped images for **Fig. 5.** **5A.** Western blot of proteins involved in ER stress in the soleus of 4, 8 and 29-week-old IT and WT mice. **5H.** Western blot of proteins downstream of mTORC1 activation and REDD1. **D.** Uncropped images for **Fig. 6.** **6C.** Western

blots for the effect of 2 week treatment of mice with 4PBA on ER stress markers in the soleus **6E**. Western blot for cytosolic cytochrome c in the cytosolic fraction of soleus from WT and IT mice treated with and without 4PBA for 2-3 weeks. **6G**. Western blot showing the effect of 2 week treatment of 4PBA on cleaved caspases in the soleus. **6I**. Western blots of p53 in the soleus of IT and WT littermates without or with 4PBA treatment for 2-3 weeks. **6K**. western blot of proteins downstream of mTORC1 in the soleus of IT and WT littermates without or with 4PBA treatment for 2-3 weeks. **E**. Uncropped images for **Fig. 8**. **8I**. western blot of ER stress proteins in 50-week-old IT mice treated with and without 4PBA. **8K**. Western blot of mitochondrial proteins from 50-week-old IT mice with and without 4PBA treatment.

**Supplementary Table 1: Antibodies used**

| Antibody                      | Company            | WB     | IHC   | Cat. No.         |
|-------------------------------|--------------------|--------|-------|------------------|
| RyR1                          | Thermo Scientific  | 1:2000 | 1:300 | MA3-925          |
| Ca <sub>v</sub> 1.1 $\alpha$  | Thermo Scientific  | 1:1000 |       | MA3-920          |
| Calsequestrin                 | Thermo Scientific  | 1:1000 | 1:400 | PA1-913          |
| SERCA1                        | Thermo Scientific  | 1:1000 |       | MA3-911          |
| SERCA2                        | Thermo Scientific  | 1:1000 |       | MA3-919          |
| Triadin                       | Thermo Scientific  | 1:1000 |       | MA3-927          |
| GAPDH                         | Santa Cruz         | 1:500  |       | sc-20357         |
| Phospho Akt1 (S473)           | Cell Signaling     | 1:1000 |       | #9271            |
| Phospho Akt1 (T308)           | Cell Signaling     | 1:1000 |       | #2965P           |
| Akt1/2                        | Santa Cruz         | 1:500  |       | sc-1619          |
| REDD1                         | Proteintech        | 1:1000 |       | 10638-1-AP       |
| Myosin Heavy Chain 1          | DSHB               |        | 1:50  | BA-F8            |
| Myosin Heavy Chain 2a         | DSHB               |        | 1:50  | sc-71            |
| Myosin Heavy Chain 2b         | DSHB               |        | 1:50  | BF-F3            |
| Phospho-eIF2 $\alpha$ (Ser51) | Cell Signaling     | 1:1000 |       | #3597            |
| eIF2 $\alpha$                 | Cell Signaling     | 1:1000 |       | #772             |
| BiP/Grp78                     | Cell Signaling     | 1:1000 |       | #3177            |
| CHOP                          | Cell Signaling     | 1:1000 |       | #2895            |
| ATF6 $\alpha$                 | ENZO Life Sciences | 1:1000 |       | ALX-804-381-C100 |
| Calnexin                      | Cell Signaling     | 1:1000 |       | #2679            |
| Grp94                         | Cell Signaling     | 1:1000 |       | #2104            |
| Ero1 $\alpha$                 | Novus Biologicals  | 1:1000 |       | NB100-2525       |
| p53                           | Santa Cruz         | 1:500  |       | sc-6243          |
| caspase 3                     | Santa Cruz         | 1:500  |       | sc-7148          |
| caspase 9                     | Cell Signaling     | 1:1000 |       | #9504            |
| caspase 12                    | Cell Signaling     | 1:1000 |       | #2202            |
| Cytochrome c                  | Cell Signaling     | 1:1000 |       | #4280            |
| ANT1/2                        | Santa Cruz         | 1:500  |       | sc-9299          |
| Sirt3                         | Cell Signaling     | 1:1000 |       | #2627            |
| UCP3                          | abcam              | 1:1000 |       | ab3477           |
| COXIV                         | Cell Signaling     | 1:1000 |       | #4844            |
| MnSOD                         | Santa Cruz         | 1:500  |       | sc-133254        |
| PGC1 $\alpha$                 | Santa Cruz         | 1:500  |       | sc-13067         |
| VDAC                          | Cell Signaling     | 1:1000 |       | #4866            |
| LC3                           | MBL International  | 1:2000 |       | PD014            |
| Parkin                        | Cell Signaling     | 1:1000 |       | #4211            |
| p-62                          | Proteintech        | 1:1000 |       | 18420-1-AP       |
| Phospho-S6 (S235/236)         | Cell Signaling     | 1:1000 |       | #4858            |
| S6                            | Cell Signaling     | 1:1000 |       | #2317            |
| Phospho-4E-BP1 (T37/47)       | Cell Signaling     | 1:1000 |       | #2855            |
| 4E-BP1                        | Cell Signaling     | 1:1000 |       | #9644            |
| Puromycin                     | KeraFAST           | 1:1000 |       | EQ-0001          |
| Ubiquitin                     | Santa Cruz         | 1:500  |       | sc-8017          |

WB=Western blotting, IHC=Immunohistochemistry

Abcam (Cambridge, MA, United States); Cell Signaling (Danvers, MA, United States); DSHB (Iowa City, United States); KeraFAST (Boston, MA, United States); Millipore (Billerica, Massachusetts, United States); ProteinTech group (Chicago, IL, United States); Santa Cruz (Santa Cruz, CA, United States); Thermo Scientific (Waltham, MA, United States); ENZO Life Sciences (Farmingdale, NY, United States); MBL (Woburn, MA, United States); Novus Biologicals (Littleton, CO, United States).
